# Supplementary material
Source: PubMed Central journal article supplement (PMC4239608)
Supplement: supp_M114.595454_jbc.M114.595454-1.pdf [file supp_M114.595454_jbc.M114.595454-1.pdf]

**SUPPLEMENTARY FIGURE S1**

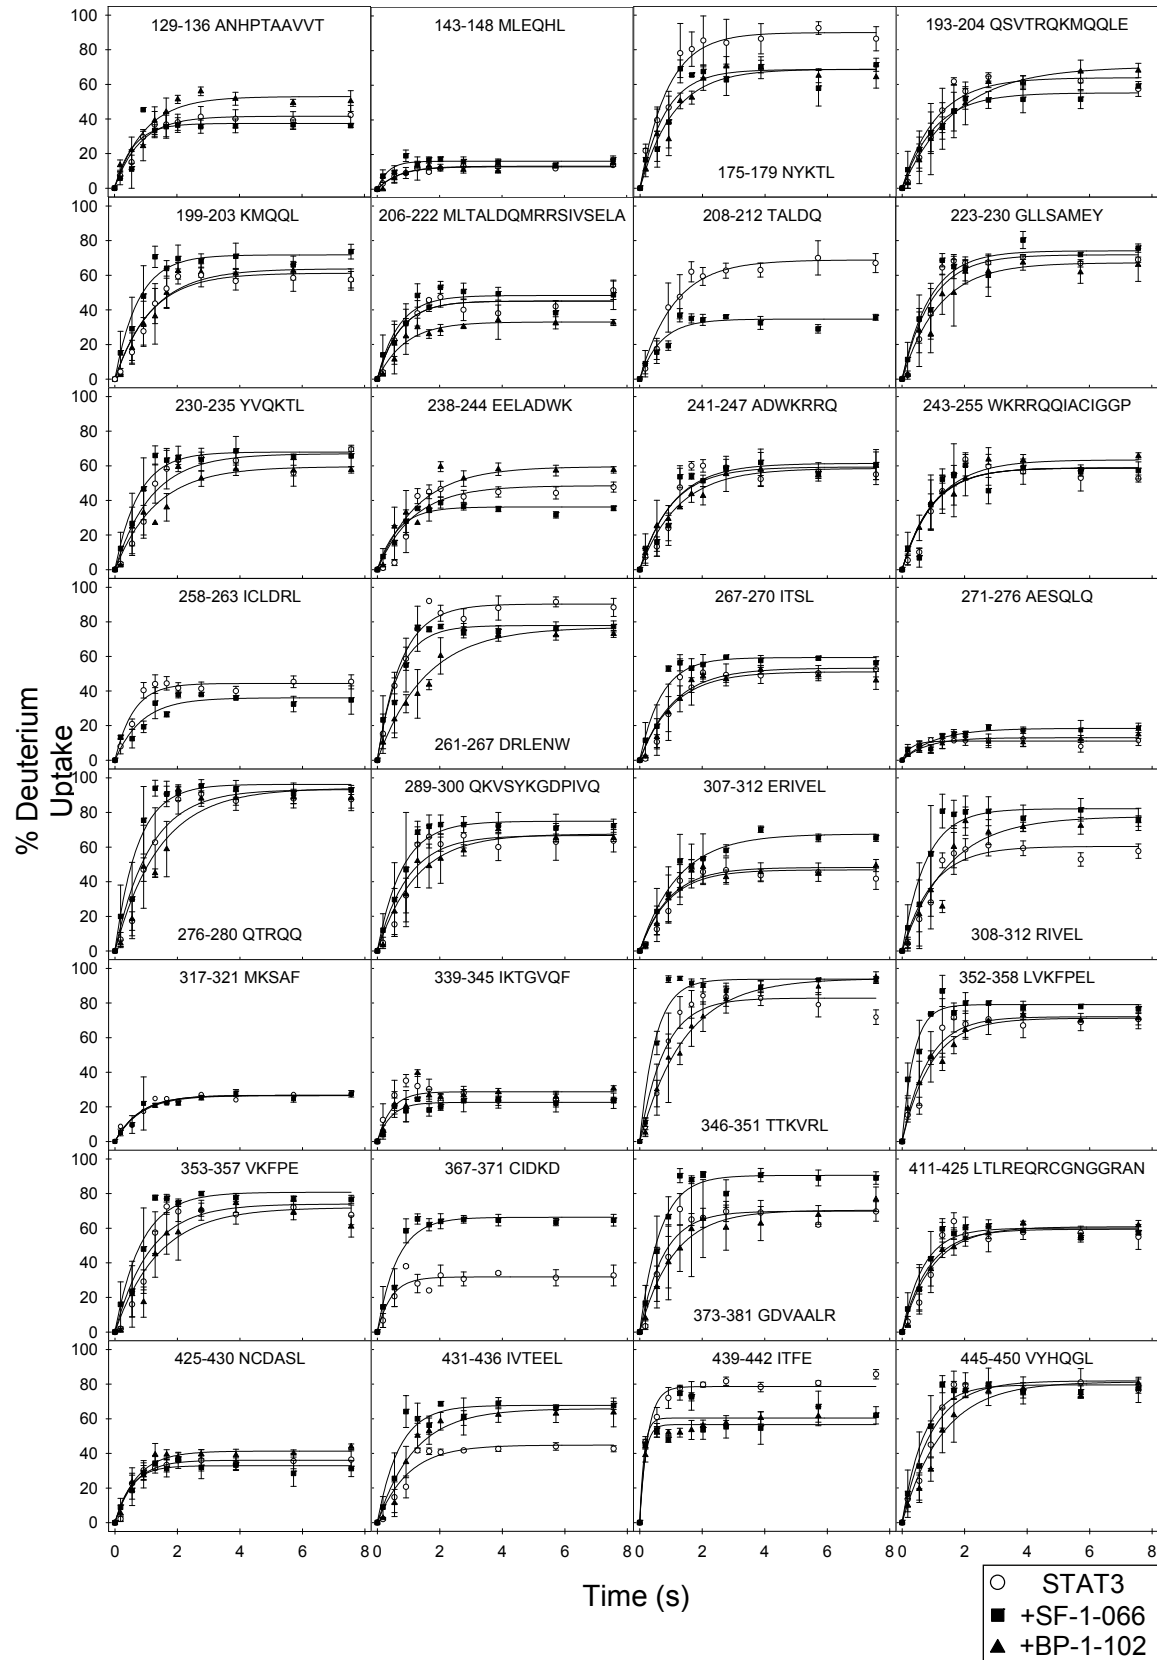

**SUPPLEMENTARY FIGURE S1**

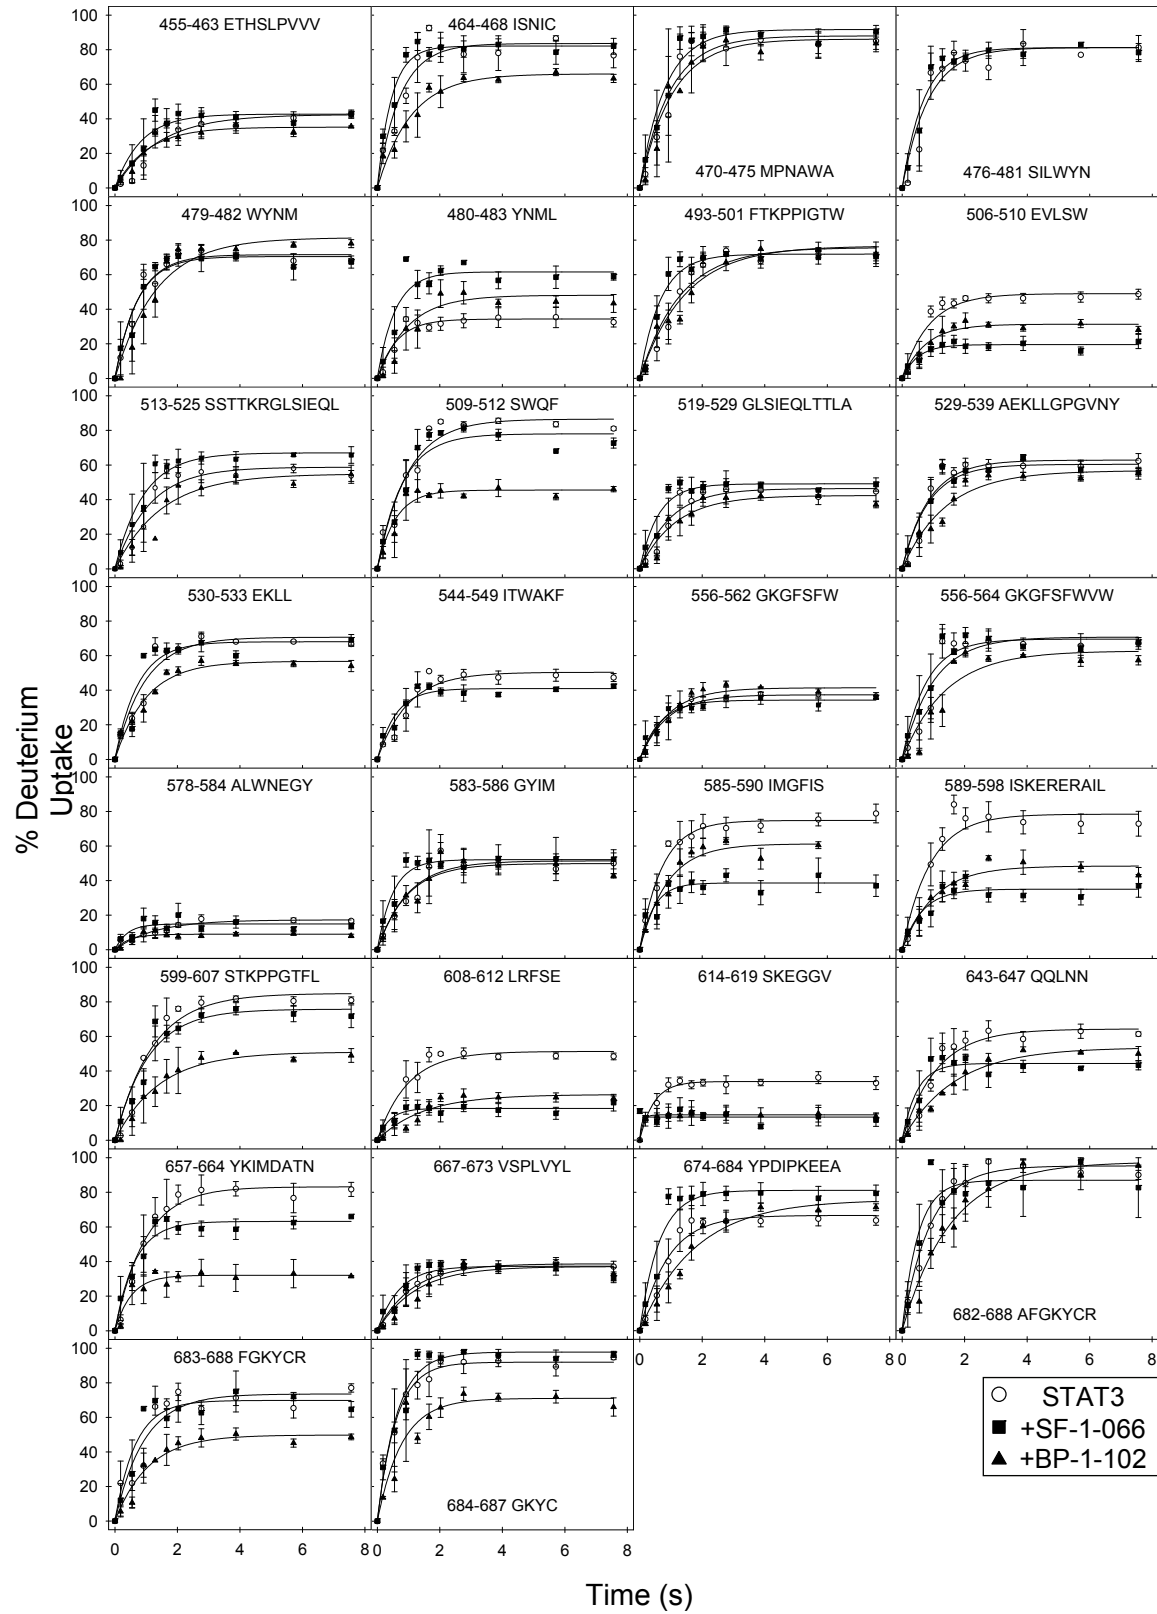

## SUPPLEMENTARY FIGURE S1

**SUPPLEMENTARY FIGURE S1.** Normalized HDX kinetic plots of deuterium uptake for peptides derived from STAT3 and STAT3-inhibitor complexes. For each of the 62 peptic peptides identified, calculated percent deuterium uptake is plotted as a function of deuterium labeling time (from 179 ms to 7.59 s) for the digested STAT3 (open circles), STAT3 complexed with SF-1-066 (filled squares), and STAT3 complexed with BP-1-102 (filled triangles). Data represent an average of triplicate runs (error bars represent SEM).
